# Supplementary material
Source: ML conference proceedings conference paper supplement (https://openreview.net/forum?id=TmkN9JmDJx1)
Supplement: supplementary_material [file attachment]

# layer 1

## head 0

(s = select( (tokens\_str,), (tokens\_str,), lambda a,b:a==b))

|       |            |   |   |   |   |   |
|-------|------------|---|---|---|---|---|
| Other | tokens_str | h | e | l | l | o |
| Me    | tokens_str | h | e | l | l | o |

|   |   |   |   |   |   |
|---|---|---|---|---|---|
|   | h | e | l | l | o |
| h | 1 |   |   |   |   |
| e |   | 1 |   |   |   |
| l |   |   | 1 | 1 |   |
| l |   |   | 1 | 1 |   |
| o |   |   |   |   | 1 |

|      |         |   |   |   |   |   |
|------|---------|---|---|---|---|---|
| X    | indices | 0 | 1 | 2 | 3 | 4 |
| f(X) | seq     | 1 | 2 | 3 | 4 | 5 |

y = aggregate(s, (indices,), lambda i:i+1)

|   |   |     |     |   |
|---|---|-----|-----|---|
| 1 | 2 | 3.5 | 3.5 | 5 |
|---|---|-----|-----|---|

|    |                                            |   |   |     |     |   |
|----|--------------------------------------------|---|---|-----|-----|---|
| X  | indices                                    | 0 | 1 | 2   | 3   | 4 |
| X  | y = aggregate(s, (indices,), lambda i:i+1) | 1 | 2 | 3.5 | 3.5 | 5 |
| FF | z = zipmap((y,indices), lambda a,b:a+b)    | 1 | 3 | 5.5 | 6.5 | 9 |
