# Supplementary material
Source: ML conference proceedings conference paper supplement (https://openreview.net/forum?id=TmkN9JmDJx1)
Supplement: supplementary_material [file attachment]

layer 1

head 0:  
block match, reps: 3, step size: 1, offset: 0, from:  
['indices']

The diagram illustrates the matching process for head 0 in layer 1. It shows a sequence of tokens: tokens, (, a, a, (, (, a, ), a, ). These tokens are connected to a vector of 12 elements. The first three elements are 1, 1, 1, corresponding to the 'a' tokens. The next three elements are 2, 2, 2, corresponding to the '(' tokens. The next three elements are -1, -1, -1, corresponding to the ')' tokens. The last three elements are -2, -2, -2, corresponding to the ')' tokens. The connections are as follows: the first 'a' token connects to the first three 1s; the second 'a' token connects to the next three 1s; the first '(' token connects to the first three 2s; the second '(' token connects to the next three 2s; the first ')' token connects to the first three -1s; the second ')' token connects to the next three -1s; the first ')' token connects to the first three -2s; and the second ')' token connects to the next three -2s.

| tokens     | ( | a | a | ( | ( | a | )  | a  | )  |    |    |
|------------|---|---|---|---|---|---|----|----|----|----|----|
| balance_0  | 1 | 1 | 1 | 2 | 2 | 2 | -1 | -1 | -1 | -2 | -2 |
| max_debt_0 | 0 | 0 | 0 | 0 | 0 | 0 | -1 | -1 | -1 | -2 | -2 |

[illegible][illegible][illegible]
