# Supplementary material
Source: ML conference proceedings conference paper supplement (https://openreview.net/forum?id=TmkN9JmDJx1)
Supplement: supplementary_material [file attachment]

layer 1

head 0:  
block match, reps: 3, step size: 1, offset: 0, from: ['indices']

|            |   |   |   |   |   |   |    |    |    |
|------------|---|---|---|---|---|---|----|----|----|
| tokens     | a | a | ( | ( | a | ) | a  | )  | )  |
| balance_0  | 1 | 1 | 1 | 0 | 0 | 0 | -2 | -2 | -2 |
| max_debt_0 | 0 | 0 | 0 | 0 | 0 | 0 | -2 | -2 | -2 |

[illegible]

layer 3

head 0:  
block match, reps: 3, step size: 9, offset: 0, from:  
['indices']

The diagram illustrates the configuration for layer 3, head 0. It shows two tables of values and a set of connections between them.

**Table 1 (Top):**

|            |    |    |    |    |    |    |    |    |    |
|------------|----|----|----|----|----|----|----|----|----|
| balance_1  | -1 | -1 | -1 | -1 | -1 | -1 | -1 | -1 | -1 |
| max_debt_1 | -1 | -1 | -1 | -1 | -1 | -1 | -1 | -1 | -1 |

**Table 2 (Bottom):**

|            |    |    |    |    |    |    |    |    |    |
|------------|----|----|----|----|----|----|----|----|----|
| balance_2  | -1 | -1 | -1 | -1 | -1 | -1 | -1 | -1 | -1 |
| max_debt_2 | -1 | -1 | -1 | -1 | -1 | -1 | -1 | -1 | -1 |

**Connections:** Lines connect the first five columns of Table 1 to the first five columns of Table 2, indicating a mapping or transformation.

[illegible]
